# Supplementary material for: 2D nanoporous Ni(OH)2 film as an electrode material for high-performance energy storage devices
Source: Royal Society of Chemistry journal article supplement (doi:10.1039/c9ra02034a), 2019-01-01
Supplement: c9ra02034a1.pdf [file c9ra02034a1.pdf]

## Supporting Information (SI)

**Table S1.** Comparison of Ni(OH)<sub>2</sub> and Ni-based electrodes recently reported in literatures

| Electrodes                         | Capacitance                                        | Cycling stability                   | References (Year) |
|------------------------------------|----------------------------------------------------|-------------------------------------|-------------------|
| Ni(OH) <sub>2</sub> /NF            | 2384.3 F g <sup>-1</sup> at 1 A g <sup>-1</sup>    | 3000, 75% at 5A g <sup>-1</sup>     | [1] (2015)        |
| Ni/Ni(OH) <sub>2</sub> /NF         | 450 F g <sup>-1</sup> at 1 mA cm <sup>-2</sup>     | 4000, 90% at 15 mA cm <sup>-2</sup> | [2] (2017)        |
| GNS/Ni(OH) <sub>2</sub> /NF        | 2053 F g <sup>-1</sup> at 0.3 A g <sup>-1</sup>    | 1000, 97% at 2.5 A g <sup>-1</sup>  | [3] (2017)        |
| Ni <sub>3</sub> S <sub>2</sub> /NF | 1293 F g <sup>-1</sup> at 5 mA cm <sup>-2</sup>    | 1000, 69% at 25 mA cm <sup>-2</sup> | [4] (2014)        |
| NiSe/NF                            | 492 F g <sup>-1</sup> at 0.5 A g <sup>-1</sup>     | 200, 91.4% at 0.5 A g <sup>-1</sup> | [5] (2016)        |
| Ni(OH) <sub>2</sub> /AC            | 2949 F g <sup>-1</sup> at 20 mV s <sup>-1</sup>    | 5000, 88% at 20 mV s <sup>-1</sup>  | [6] (2017)        |
| GNS/Ni(OH) <sub>2</sub>            | 1335 F g <sup>-1</sup> at 2.8 A g <sup>-1</sup>    | 2000, 100% at 0.5 A g <sup>-1</sup> | [7] (2010)        |
| Ni(OH) <sub>2</sub> /NF            | 340 mAh g <sup>-1</sup> at 1 A g <sup>-1</sup>     | 3000, 81.1% at 10 A g <sup>-1</sup> | [8] (2018)        |
| Ni(OH) <sub>2</sub> /NF            | 453.6 mAh g <sup>-1</sup> at 0.5 A g <sup>-1</sup> | 2000, 85.6% at 10 A g <sup>-1</sup> | this work         |

### References:

- [1] X. Xiong, D. Ding, D. Chen, G. Waller, Y. Bu, Z. Wang, M. Liu, Three-dimensional ultrathin Ni(OH)<sub>2</sub> nanosheets grown on nickel foam for high-performance supercapacitors. *Nano Energy*, 2015, 11: 154–161.
- [2] S. R. Ede, S. Anantharaj, K. T. Kumaran, S. Mishra, S. Kundu, One step synthesis of Ni/Ni(OH)<sub>2</sub> nano sheets (NSs) and their application in asymmetric supercapacitors. *RSC Advances*, 2017, 7(10): 5898–5911.
- [3] H. Chai, X. Peng, T. Liu, X. Su, D. Jia, W. Zhou, High-performance supercapacitors based on conductive graphene combined with Ni(OH)<sub>2</sub> nanoflakes. *RSC Advances*, 2017, 7(58): 36617–36622.
- [4] K. Krishnamoorthy, G. K. Veerasubramani, S. Radhakrishnan, S. J. Kim, One pot hydrothermal growth of hierarchical nanostructured Ni<sub>3</sub>S<sub>2</sub> on Ni foam for supercapacitor application. *Chemical Engineering Journal*, 2014, 251: 116–122.
- [5] K. Guo, F. Yang, S. Cui, W. Chen, L. Mi, Controlled synthesis of 3D hierarchical NiSe microspheres for high-performance supercapacitor design. *RSC Advances*, 2016, 6(52): 46523–46530.
- [6] Y. Wang, X. Zhang, X. Li, X. Li, Y. Zhao, H. Wei, M. Liang, Highly dispersed ultrasmall Ni(OH)<sub>2</sub> aggregated particles on a conductive support as a supercapacitor electrode with superior performance.

Journal of Colloid and Interface Science, 2017, 490: 252–258.

[7] H. Wang, H. S. Casalongue, Y. Liang, H. Dai, Ni(OH)<sub>2</sub> Nanoplates Grown on Graphene as Advanced Electrochemical Pseudocapacitor Materials. *Journal of the American Chemical Society*, 2010, 132(21): 7472–7477.

[8] J. Guo, Y. Zhao, N. Jiang, A. Liu, L. Gao, Y. Li, T. Ma, In-Situ Grown Ni(OH)<sub>2</sub> Nanosheets on Ni Foam for Hybrid Supercapacitors with High Electrochemical Performance. *Journal of The Electrochemical Society*, 2018, 165(5), A882–A890.

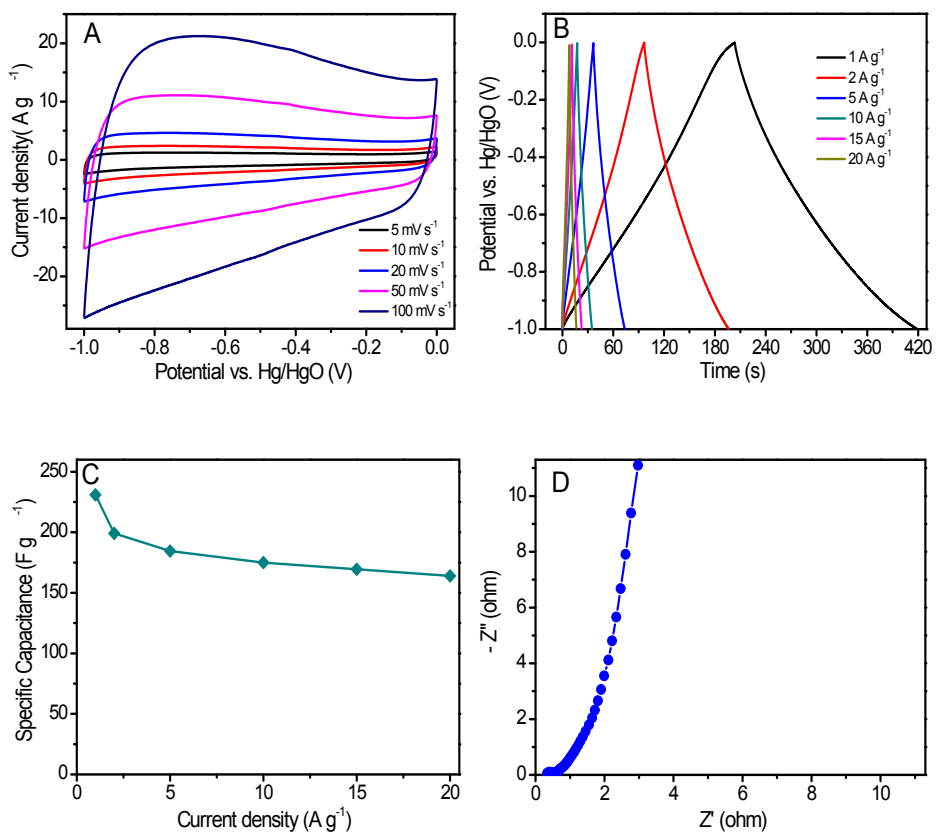

**Fig. S1** (A) CV curves at different scan rates, (B) GCD curves under different discharging current densities, (C) Specific capacitance at different current densities, (D) Nyquist impedance plots of activated carbon's in 6 M KOH aqueous solution and the activated carbon mass loading is about 5 mg.

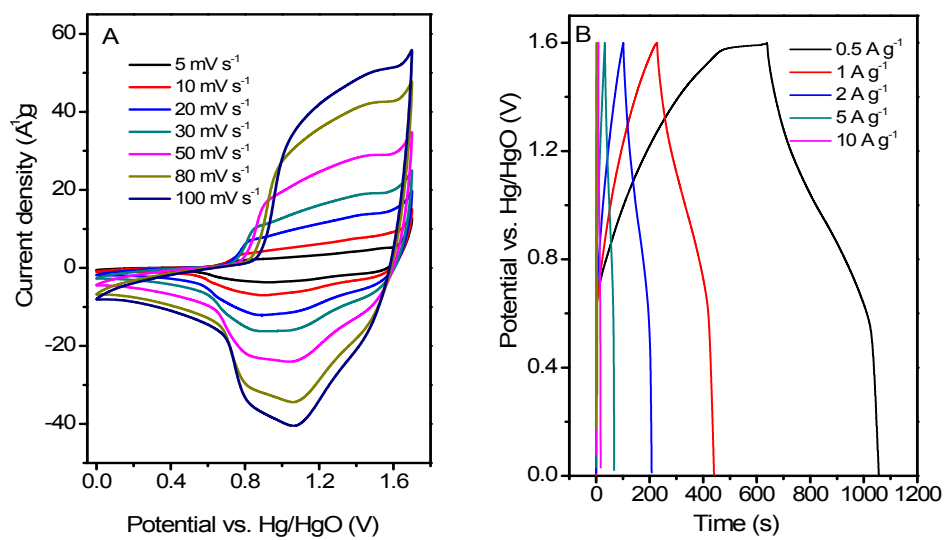

**Fig. S2** (A) CV curves at various scan rates, (B) GCD curves at different current density of Ni(OH)<sub>2</sub> film-multiple bending//AC ASC in 6 M KOH.

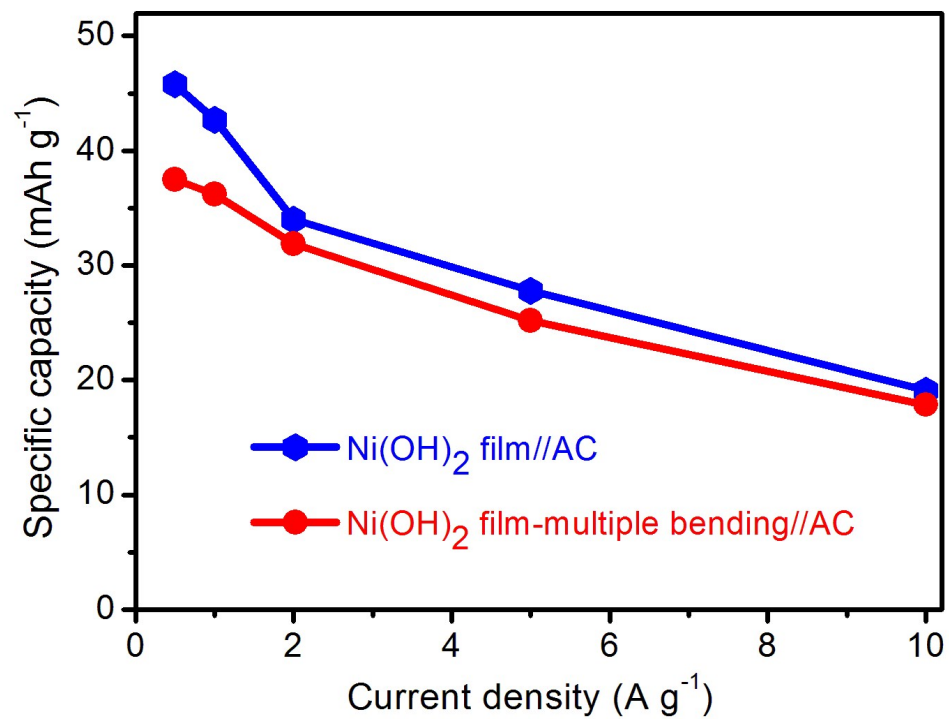

**Fig. S3** the specific capacity of Ni(OH)<sub>2</sub> film//AC and Ni(OH)<sub>2</sub> film-multiple bending//AC ASCs at different current densities.
